# Supplementary material
Source: Springer Nature journal article supplement (https://www.springermedizin.de/resource/supplementary/12885_2012_3959_MOESM4_ESM.pdf/9464880)

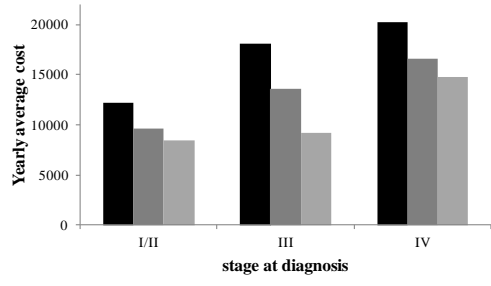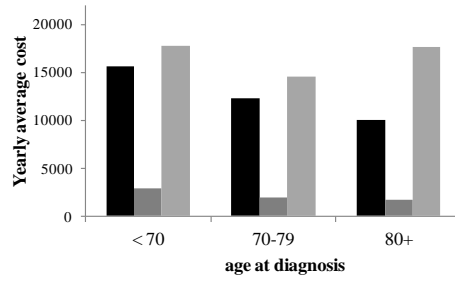

Supplement: MOESM4 [file 9464880]
